# Supplementary material for: Copy Number Variation Mapping and Genomic Variation of Autochthonous and Commercial Turkey Populations
Source: Front Genet. 2019 Oct 29;10:982. doi: 10.3389/fgene.2019.00982 (PMC6828962; doi:10.3389/fgene.2019.00982)
Supplement: Supplementary Table S4 — CNVRs with at least 2 individuals and detected only in one population (breed_CNVRs) (sheet1); References related to sheet1 (sheet2). [file Table_4.xlsx]

## Sheet: CNVRs
Supplementary Table S4. CNVRs with at least 2 individuals and detected only in one breed (breed_CNVRs)
CNVR_ID	Chr	Start	End	Samples*	CNVR State	Genes	Traits	Organism	References
BR (n=31)
CNVR_58	1	22887390	22922402	2	gain	KCND2	Maintenance and production of learned vocalizations	Birds	Lovell et al., (2013)
CNVR_69	1	26682440	26853466	17	gain	LRRN3	Aging	Human	Harries et al., (2011)
						IMMP2L	Fertility/Aging	Mice	Bharadwaja et al., (2014)
							Collective Behaviors	Zebrafish	Tang et al., (2018)
CNVR_331	1	153425889	153430199	2	loss
CNVR_850	2	75011681	75030191	3	gain
CNVR_869	2	80627540	80637879	2	loss
CNVR_1155	3	55017528	55019465	2	gain
CNVR_1247	4	3317979	3323973	2	gain	NAF1	Reproduction	Pig	Fang et al., (2011)
CNVR_1317	4	41855086	41873438	2	gain	LOC109363685 (TLR2A)	Immunity	Birds	Velová et al., (2018)
CNVR_1380	5	665819	681678	2	gain	TCP11L1
CNVR_1591	7	31981806	31990830	2	loss
CNVR_1592	7	32002059	32006325	2	loss
CNVR_469	11	2115253	2116625	2	gain
CNVR_531	12	15284506	15290066	3	gain
CNVR_538	12	18988164	18990974	2	gain	FAM96A
CNVR_615	15	9016041	9019563	2	loss
CNVR_988	22	6591022	6594634	2	gain
CNVR_1008	25	3524942	3530365	2	gain	FHL3	Leg action	Pigs	Fan et al., (2011b)
							Muscle fiber type composition	Mouse (in vitro study)	Zhang et al., (2016)
BrCl (n=5)
CNVR_141	1	60207061	60211406	2	loss	MICAL3	Osteoarthritis	Human	Ratnayake et al., (2012)
CoEu (n=22)
CNVR_161	1	73102527	73121689	2	gain	ARHGEF5	Immunity	Mouse (in vitro study)	Wang et al., (2009)
CNVR_167	1	79137421	79175597	2	gain
CNVR_783	2	45443975	45446073	3	loss
CNVR_873	2	82656296	82658819	3	gain
CNVR_1052	3	4972513	4973889	7	loss
CNVR_1367	4	66686071	66712589	2	loss
CNVR_466	11	1166208	1168850	6	loss	OPA1	Muscle inflammation	Mice	Rodríguez-Nuevo et al., (2018)
CNVR_483	11	15222514	15231473	2	gain	THPO	Hematopoiesis	Mice	Barbieri et al., (2018)
						CHRD	Bone morphogenetic	all species	UniProt database
CNVR_607	15	4836295	4848359	2	gain
CNVR_1019	26	4718353	4732689	2	loss
ErRo (n=9)
CNVR_1083	3	18762806	18813196	2	loss	LOC100548692
CNVR_1319	4	42553321	42559337	2	loss	NMU	Body weight and fat mass	Human	Hainerová et al., (2006)
CNVR_1402	5	11366976	11371692	5	loss
CNVR_496	11	21237290	21253804	3	loss
CNVR_630	15	17014515	17016977	2	gain	TCF7	Immunity	Mice	Zhu et al., (2015)
CNVR_1237	30	3321664	3323591	2	loss	LOC100547703
NI (n=26)
CNVR_24	1	10810156	10814773	2	gain	DLD
						LOC104917450 aminin subunit beta 4 (LAMB4)
CNVR_42	1	17146079	17166742	5	gain
CNVR_44	1	18333113	18340324	10	loss
CNVR_70	1	26932568	26941493	2	gain	IMMP2L	Fertility/Aging	Mice	Bharadwaja et al., (2014)
							Collective Behaviors	Zebrafish	Tang et al., (2018)
CNVR_184	1	90119078	90121928	11	loss
CNVR_213	1	100230097	100235153	2	loss
CNVR_228	1	111714447	111737887	2	gain	CFAP47
CNVR_310	1	146201080	146223675	2	gain
CNVR_340	1	156002537	156044875	2	gain
CNVR_722	2	9479087	9482328	3	loss	LOC104909519
CNVR_797	2	51589015	51634295	3	complex
CNVR_908	2	98853020	98874337	7	gain
CNVR_932	2	105967166	105987500	2	gain	LOC104910037 (block of proliferation 1 (BOP1)
						SCX	Myocardial remodeling	all species	NCBI
CNVR_1131	3	43790248	43791763	2	gain	PPP4R1
CNVR_1205	3	78336389	78352864	2	gain	LOC104910440
CNVR_1257	4	7910973	7957269	2	gain
CNVR_1260	4	9451898	9456516	2	loss	RNF150	Residual feed intake phenotypes	Bovine	Tizioto et al., (2015)
CNVR_1330	4	50604610	50636372	2	gain
CNVR_1473	5	48780066	48783254	2	loss	WDR20
CNVR_1486	5	56091855	56101756	6	loss	MDGA2
CNVR_1519	6	17352411	17362856	2	loss
CNVR_1526	6	18416612	18437772	2	gain
CNVR_1590	7	30092851	30105972	3	gain	MBD5	Somatic Growth and Glucose Homeostasis	Mice	Du et al., (2012)
CNVR_1633	8	29221997	29227462	5	loss
CNVR_1641	9	5175182	5199741	4	gain	CSTF2	Learning Behaviors	Mice	Harris et al., (2016)
							Infertility	Mice	Tardif et al., (2010)
						TRMT12
						SYTL4	Sexually dimorphic behaviors	Mice	Xu et al., (2012)
						NOX1
						SRPX2	Vocal learning	Humans, songbirds, mice	Condro and White (2014)
CNVR_1650	9	7448637	7456924	2	complex
CNVR_470	11	2316558	2320675	2	gain
CNVR_493	11	21042430	21061583	2	loss
CNVR_542	13	460407	462094	2	loss
CNVR_608	15	5200856	5203768	2	loss
CNVR_627	15	14751704	14759834	2	gain
CNVR_965	21	2487150	2522661	2	gain	ATP2A3	Eggshall quality	Chicken	Duan et al., (2015)
						LOC104913863
CNVR_998	23	2198187	2203979	2	complex	LOC104914165 (arginine-glutamic acid dipeptide repeats (RERE)
PrPc (n=13)
CNVR_344	1	156856412	156886543	2	gain
CNVR_396	1	175794189	175808059	2	loss
CNVR_397	1	175858843	176089042	5	loss	VMO1	Immunity	Chicken	Lim and Song (2015)
						GUCY1A2	Host response to viral infection/inflammatory response	Poultry	Saelao et al., (2018)
							Gastrointestinal parasites resistance	Sheep	Berton et al., (2017)
CNVR_1073	3	16332863	16339724	3	loss
CNVR_1489	5	56942811	56960200	4	gain	DNAAF2
						POLE2
CNVR_1645	9	6358412	6382856	3	gain
CNVR_477	11	12694075	12698498	2	gain	FGF12	Adaptive Modifications of Muscle Phenotype in High-Altitude	Mice	Scott et al., (2015)
NARR (n=7)
CNVR_933	2	106243067	106249355	2	loss
CNVR_1181	3	69742703	69759181	4	loss	NBN	Immune response to the influenza A virus	Chicken	Jang et al., (2015)
CNVR_1420	5	20075007	20158750	2	gain	LRRC4C
CNVR_1507	6	7633195	7636857	2	loss	SHH	Comb morphogenesis	Chicken	Boije et al., (2012)
							Mitogenic and morphogenetic processes throughout feather development	Chicken	Ng et al., (2015)
CNVR_1629	8	25894281	25901418	2	gain	LOC104912027 (TCF7L2)	High blood glucose levels	Birds (including Chicken and Turkey)	Machado et al., (2016)
							Follicle growth of feathers	Birds	Musser et al., (2016)
MEX (n=26)
CNVR_18	1	7665394	7670844	2	gain
CNVR_31	1	13755080	13765956	2	complex
CNVR_49	1	21275407	21289072	2	loss	SPAM1	Male fertility	Pig	Day et al., (2002)
CNVR_79	1	31083228	31095592	2	gain
CNVR_115	1	48996992	49013286	2	gain
CNVR_155	1	70315710	70331242	2	gain	LOC104912557
CNVR_166	1	78868995	78875787	2	gain	C1H3orf30
						IGSF11	Male fertility	Mice	Pelz et al., (2017)
CNVR_187	1	92104234	92111058	2	loss
CNVR_197	1	96844957	96905826	2	gain
CNVR_284	1	139296982	139307385	2	gain
CNVR_291	1	141838401	141850727	2	loss
CNVR_306	1	145451576	145455865	5	loss
CNVR_328	1	152914472	152990880	2	gain
CNVR_395	1	175132611	175184405	2	loss
CNVR_401	1	179093676	179099213	3	loss
CNVR_419	1	187926543	187934798	2	gain
CNVR_764	2	34449131	34456645	3	gain	GPAT2	Fatty acid composition and growth traits	Pig	Revilla et al., (2017)
CNVR_779	2	42292127	42295207	2	gain
CNVR_786	2	46212499	46215009	2	loss	SASH1
CNVR_803	2	54673323	54699937	4	loss
CNVR_844	2	72220017	72236271	2	complex
CNVR_852	2	75769027	75791735	2	gain
CNVR_854	2	76489255	76502601	2	gain
CNVR_1153	3	54763054	54791559	2	loss	DSG2
CNVR_1163	3	59942095	59944806	2	gain
CNVR_1215	3	86876766	86936041	2	gain
CNVR_1227	3	93169533	93170598	2	gain
CNVR_1248	4	4038255	4045727	2	gain	TLL1
CNVR_1252	4	5248891	5268412	3	loss	NEK1
CNVR_1294	4	28035679	28131621	2	gain	LOC100545106 (Rho guanine nucleotide exchange factor 38 (ARHGEF38)
						INTS12	Lung function	Human	Obeidat et al., (2015)
						LOC104910653 (glutathione S-transferase C-terminal domain containing (GSTCD))
CNVR_1342	4	57021134	57031956	2	gain
CNVR_1477	5	51399688	51426240	4	gain	IQGAP3	Feeding rate and time spent for eating	Pig	Reyer et al., (2017)
						JAG2	Regulators of adiposity	Chicken and mice	Roux et al., (2015)
CNVR_1501	6	6019513	6039292	2	gain	XYLB	Fat deposition	Chicken	Abdalla et al., (2018)
CNVR_1551	6	40555965	40605434	4	loss	MRPL3	Earlobe color trait	Chicken	Wragg et al., (2012)
						NEK11	Immunity	Bovine	Strillacci et al., (2014)
CNVR_1583	7	24199559	24256083	2	gain	PARP15	Immunity	all species	Daugherty et al., (2014)
CNVR_474	11	5867978	5875244	2	loss
CNVR_506	11	23694003	23714029	2	gain
CNVR_535	12	17335755	17362352	2	gain	SLC24A1	Adapting to nocturnality (vision)	Birds	Wu and Whang (2018)
						DENND4A
CNVR_577	14	7788433	7801102	2	gain	ERC2	Response to stress	Chicken	Coble (2013)
CNVR_629	15	16754715	16769427	2	loss
CNVR_632	16	177872	180194	2	gain
CNVR_699	19	4342180	4358349	3	gain
CNVR_701	19	5128731	5144247	5	loss	ZDHHC12
						ZER1	Oxygen saturation trait	Human	Lee et al., (2014)
						PKN3
CNVR_707	19	7796814	7802857	2	loss	GPSM1
CNVR_961	21	325756	351646	2	loss	RTN4RL1
HYB (n=38)
CNVR_98	1	37918908	37924065	2	gain
CNVR_116	1	49137491	49147446	2	gain	JOSD1	Bone phenotypic	Poultry	Rubin et al., (2007)
							Tenderness induced by acute stress	Bovine	Zhao et al., (2012)
						TOMM22	Hepatocyte survival	Zebrafish	Curado et al., (2010)
						CBY1	Adipose deposition	Chicken	Ji (2013)
						DMC1	Male-Specific Sterility	Mice	Bannister et al., (2007)
CNVR_257	1	126424731	126431118	2	gain
CNVR_728	2	14942501	14956327	2	gain
CNVR_729	2	14991328	15003898	2	gain
CNVR_812	2	59651757	59670553	2	gain	LOC104909800 (MROH2AL2)
CNVR_892	2	90173609	90184392	2	gain
CNVR_1278	4	19788649	19792544	2	gain
CNVR_1312	4	38699558	38703085	9	loss
CNVR_1483	5	55021551	55023645	2	loss
CNVR_1572	7	8512364	8528015	5	gain
CNVR_1593	7	34609787	34633016	2	gain
CNVR_528	12	13262578	13266505	2	gain	AKAP13	Cardiac development	Mice	Mayers et al., (2010)
CNVR_551	13	4767624	4773295	5	loss
CNVR_622	15	11484405	11491937	4	loss
CNVR_677	17	10207103	10208781	2	loss

## Sheet: References
Abdalla, B.A., Chen J., Nie, Q., Zhang X. (2018). Genomic insights into the multiple factors controlling abdominal fat deposition in a chicken model. Front. Genet. 9:262. doi: 10.3389/fgene.2018.00262.
Bannister, L.A., Pezza, R.J., Donaldson, J.R., de Rooij, D.G., Schimenti, K.J., Camerini-Otero, R.D., et al. (2007). A dominant, recombination-defective allele of Dmc1 causing male-specific sterility. PLoS Biol. 5(5):e105. doi: 10.1371/journal.pbio.0050105
Barbieri, D., Elvira-Matelot, E., Pelinski, Y., Genève, L., de Laval, B., Yogarajah, G., et al. (2018). Thrombopoietin protects hematopoietic stem cells from retrotransposon-mediated damage by promoting an antiviral response. J Exp Med. 215(5):1463-80. doi: 10.1084/jem.20170997.
Berton, M.P., de Oliveira, Silva R.M., Peripolli, E., Stafuzza, N.B., Martin, J.F., Álvarez, M.S., et al. (2017). Genomic regions and pathways associated with gastrointestinal parasites resistance in Santa Inês breed adapted to tropical climate. J Anim Sci Biotechnol. 8:73. doi: 10.1186/s40104-017-0190-4.
Bharadwaj, M.S., Zhou, Y., Molina, A.J., Criswell, T., Lu, B. (2014). Examination of bioenergetic function in the inner mitochondrial membrane peptidase 2-like (Immp2l) mutant mice. Redox Biol. 2:1008-15. doi: 10.1016/j.redox.2014.08.006.
Boije, H., Harun-Or-Rashid, M., Lee, Y.J., Imsland, F., Bruneau, N., Vieaud, A., et al. (2012). Sonic Hedgehog-signalling patterns the developing chicken comb as revealed by exploration of the pea-comb mutation. PLoS One. 7(12):e50890. doi: 10.1371/journal.pone.0050890
Condro, M.C., White, S.A. (2014). Recent advances in the genetics of vocal learning. Comp Cogn Behav Rev. 9:75-98. DOI:10.3819/ccbr.2014.90003.
Coble, D.J.(2013). The effects of biotic and abiotic stressors on gene expression in chickens. Graduate Theses and Dissertations. 13346. https://lib.dr.iastate.edu/etd/13346
Curado, S., Ober, E.A., Walsh, S., Cortes-Hernandez, P., Verkade H., Koehler C.M., et al. The mitochondrial import gene tomm22 is specifically required for hepatocyte survival and provides a liver regeneration model. Dis Model Mech. 3(7-8):486-95. doi: 10.1242/dmm.004390.
Danilo, M., Chennupati, V., Silva, J.G., Siegert, S., Held, W. (2018). Suppression of Tcf1 by inflammatory cytokines facilitates effector CD8 T cell differentiation. Cell Rep. 22(8):2107-2117. doi: 10.1016/j.celrep.2018.01.072
Daugherty, M.D., Young, J.M., Kerns, J.A., Malik, H.S. (2014). Rapid evolution of PARP genes suggests a broad role for ADP-ribosylation in host-virus conflicts. PLoS Genet. 10(5):e1004403. doi: 10.1371/journal.pgen.1004403
Day, A.E., Quilter, C.R., Sargent, C.A., Mileham, A.J. (2002). Characterization of the porcine sperm adhesion molecule gene SPAM1–expression analysis, genomic structure, and chromosomal mapping. Anim Genet. 33(3):211-4.
Du, Y., Liu, B., Guo, F., Xu, G., Ding, Y., Liu, Y., Sun, X., Xu, G. (2012). The essential role of Mbd5 in the regulation of somatic growth and glucose homeostasis in mice. PLoS One. 7(10):e47358. doi: 10.1371/journal.pone.0047358.
Duan, Z., Chen, S., Sun, C., Shi, F., Wu, G., Liu, A., Xu, G., Yang, N. (2015). Polymorphisms in ion transport genes are associated with eggshell mechanical property. PLoS One. 10(6):e0130160. doi: 10.1371/journal.pone.0130160
Fan, B., Onteru, S.K., Du, Z.Q., Garrick, D.J., Stalder, K.J., Rothschild, M.F. (2011). Genome-wide association study identifies loci for body composition and structural soundness traits in pigs. PLoS One. 6(2):e14726. doi: 10.1371/journal.pone.0014726.
Fang, M., Du, H., Hu, Y., Zhou, X., Ouyang, H., Zhang, W., et al. (2011). Identification and characterization of the pig ABIN-1 gene and investigation of its association with reproduction traits. J Genet. 90(1):e10-20.
Hainerová, I., Torekov, S.S., Ek J., Finková, M., Borch-Johnsen, K., Jørgensen, T., et al.. (2006). Association between neuromedin U gene variants and overweight and obesity. J Clin Endocrinol Metab. 91(12):5057-63. doi:10.1210/jc.2006-1442
Harries, L.W., Hernandez, D., Henley, W., Wood, A.R., Holly, A.C., Bradley‐Smith, R.M., et al. (2011). Human aging is characterized by focused changes in gene expression and deregulation of alternative splicing. Aging Cell. 10(5):868-78. doi: 10.1111/j.1474-9726.2011.00726.x.
Jang, H.J., Lee, H.J., Kang, K.S., Song, K.D., Kim, T.H., Song, C.S., et al. (2015). Molecular responses to the influenza A virus in chicken trachea-derived cells. Poult Sci. 94(6):1190-201. doi: 10.3382/ps/pev033.
Ji, Bo, Pathway profiling identifies mechanisms of adipose deposition in domestic chickens. (2013). PhD diss., University of Tennessee. https://trace.tennessee.edu/utk_graddiss/1742
Lee, D.Y., Hanis, C., Bell, G.I., Aguilar, D.A., Redline, S., Below, J., et al. (2014). Genetic studies of physiological traits with their application to sleep apnea. arXiv preprint arXiv:1410.7363
Lim, W. and Song, G. (2015). Differential expression of vitelline membrane outer layer protein 1: hormonal regulation of expression in the oviduct and in ovarian carcinomas from laying hens. Mol Cell Endocrinol. 399:250-8. doi: 10.1016/j.mce.2014.10.015
Lovell, P.V., Carleton, J.B., Mello, C.V. (2013). Genomics analysis of potassium channel genes in songbirds reveals molecular specializations of brain circuits for the maintenance and production of learned vocalizations. BMC Genomics. 14:470. doi:10.1186/1471-2164-14-470
Machado J.P., Johnson W.E., Gilbert M.T., Zhang G., Jarvis E.D., O'Brien S.J., Antunes A. (2016).Bone-associated gene evolution and the origin of flight in birds. BMC Genomics.17:371. doi: 10.1186/s12864-016-2681-7.
Mayers, C.M., Wadell, J., McLean, K., Venere, M., Malik, M., Shibata, T., Driggers, P., Het, al. (2010). The Rho guanine nucleotide exchange factor AKAP13 (BRX) is essential for cardiac development in mice. J Biol Chem. 285(16):12344-54 doi: 10.1074/jbc.M110.106856
Musser, J.M., Wagner, G.P., Liang, C., Stabile, F.A., Cloutier, A., Baker, A.J., et al. (2018). Subdivision of ancestral scale genetic program underlies origin of feathers and avian scutate scales. bioRxiv. 377358. doi: https://doi.org/10.1101/377358
Ng, C.S., Chen, C.K., Fan, W.L., Wu, P., Wu, S.M., Chen, J.J., et al. (2015). Transcriptomic analyses of regenerating adult feathers in chicken. BMC Genomics. 16:756. doi: 10.1186/s12864-015-1966-6.
Obeidat, M.E., Hao, K., Bossé, Y., Nickle, D.C., Nie, Y., Postma, D.S., et al. (2015). Molecular mechanisms underlying variations in lung function: a systems genetics analysis. Lancet Respir Med. 3(10):782-95. doi: 10.1016/S2213-2600(15)00380-X.
Pelz, L., Purfürst, B., Rathjen, F.G. (2017). The cell adhesion molecule BT-IgSF is essential for a functional blood–testis barrier and male fertility in mice. J Biol Chem. 292(52):21490-21503. doi: 10.1074/jbc.RA117.000113.
Ratnayake, M., Reynard, L.N., Raine, E.V., Santibanez-Koref, M., Loughlin, J. (2012). Allelic expression analysis of the osteoarthritis susceptibility locus that maps to MICAL3. BMC Med Genet. 13:12. doi: 10.1186/1471-2350-13-12.
Revilla, M., Puig-Oliveras, A., Castelló, A., Crespo-Piazuelo, D., Paludo, E., Fernández, A.I., et al. (2017). A global analysis of CNVs in swine using whole genome sequence data and association analysis with fatty acid composition and growth traits. PLoS One. 12(5):e0177014. doi: 10.1371/journal.pone.0177014.
Reyer, H., Shirali, M., Ponsuksili, S., Murani, E., Varley, P.F., Jensen, J., et al. (2017). Exploring the genetics of feed efficiency and feeding behaviour traits in a pig line highly selected for performance characteristics. Mol Genet Genomics. 292(5):1001-1011. doi: 10.1007/s00438-017-1325-1
Rodríguez‐Nuevo, A., Díaz‐Ramos, A., Noguera, E., Díaz‐Sáez, F., Duran, X., Muñoz, J.P., et al. (2018). Mitochondrial DNA and TLR9 drive muscle inflammation upon Opa1 deficiency. EMBO J. 37(10). pii: e96553. doi: 10.15252/embj.201796553.
Roux, P.F., Boitard, S., Blum, Y., Parks, B., Montagner, A., Mouisel, E., et al. (2015). Combined QTL and selective sweep mappings with coding SNP annotation and cis-eQTL analysis revealed PARK2 and JAG2 as new candidate genes for adiposity regulation. G3 (Bethesda). 5(4):517-29. doi: 10.1534/g3.115.016865.
Rubin, C.J., Lindberg, J., Fitzsimmons, C., Savolainen, P., Jensen, P., Lundeberg, J., et al. (2007). Differential gene expression in femoral bone from red junglefowl and domestic chicken, differing for bone phenotypic traits. BMC Genomics. 8:208. doi: 10.1186/1471-2164-8-208.
Saelao, P., Wang, Y., Gallardo, R.A., Lamont, S.J., Dekkers, J.M., Kelly, T., et al. (2018). Novel insights into the host immune response of chicken Harderian gland tissue during Newcastle disease virus infection and heat treatment. BMC Vet Res. 14(1):280. doi: 10.1186/s12917-018-1583-0.
Scott, G.R., Elogio, T.S., Lui, M.A., Storz, J.F., Cheviron, Z.A. (2015). Adaptive modifications of muscle phenotype in high-altitude deer mice are associated with evolved changes in gene regulation. Mol Biol Evol. 32(8):1962-76. doi: 10.1093/molbev/msv076.
Strillacci, M.G., Frigo E., Schiavini F., Samoré A.B., Canavesi F., Vevey M., et al. (2014) Genome-wide association study for somatic cell score in Valdostana Red Pied cattle breed using pooled DNA. BMC Genet. 15:106. doi: 10.1186/s12863-014-0106-7.
Tang, W., Zhang, G., Serluca, F., Li, J., Xiong, X., Coble, M., et al. (2018). Genetic architecture of collective behaviors in zebrafish. bioRxiv. 1:350314. doi: https://doi.org/10.1101/350314
Tardif, S., Akrofi A.S., Dass, B., Hardy, D.M., MacDonald, C.C. (2010). Infertility with impaired zona pellucida adhesion of spermatozoa from mice lacking TauCstF-64. Biol Reprod. 83(3):464-72. doi: 10.1095/biolreprod.109.083238.
Tizioto, P.C., Coutinho, L.L., Decker, J.E., Schnabel, R.D., Rosa, K.O., Oliveira, P.S., et al. (2015). Global liver gene expression differences in Nelore steers with divergent residual feed intake phenotypes. BMC Genomics. 16:242 doi: 10.1186/s12864-015-1464-x
Velová, H., Gutowska-Ding, M.W., Burt, D.W., Vinkler, M. (2018). Toll-Like Receptor Evolution in Birds: Gene Duplication, Pseudogenization, and Diversifying Selection. Mol Biol Evol. 35(9), 2170-2184. doi: 10.1093/molbev/msy119.
Wang, Z., Kumamoto, Y., Wang, P., Gan, X., Lehmann, D., Smrcka, A.V., et al. (2009). Regulation of immature dendritic cell migration by RhoA guanine nucleotide exchange factor Arhgef5. J Biol Chem. 284(42):28599-606. doi: 10.1074/jbc.M109.047282
Wragg, D., Mwacharo, J.M., Alcalde, J.A., Hocking, P.M., Hanotte, O. (2012). Analysis of genome-wide structure, diversity and fine mapping of Mendelian traits in traditional and village chickens. Heredity (Edinb). 109(1):6-18. doi: 10.1038/hdy.2012.9
Wu, Y., Wang, H. (2019). Convergent evolution of bird-mammal shared characteristics for adapting to nocturnality. R Soc Open Sci. 286(1897):20182185. doi: https://doi.org/10.1098/rspb.2018.2185
Xu, X., Coats, J.K., Yang, C.F., Wang, A., Ahmed, O.M., Alvarado, M., et al. (2012). Modular genetic control of sexually dimorphic behaviors. Cell. 148(3):596-607. doi: 10.1016/j.cell.2011.12.018.
Zhang, Y., Li, W., Zhu, M, Li, Y, Xu, Z, Zuo, B. (2016). FHL3 differentially regulates the expression of MyHC isoforms through interactions with MyoD and pCREB. Cell Signal. 28(1):60-73. doi: 10.1016/j.cellsig.2015.10.008.
Zhao, C., Tian, F., Yu, Y., Luo, J., Mitra, A., Zhan, F., et al. (2012). Functional genomic analysis of variation on beef tenderness induced by acute stress in Angus cattle. Comp Funct Genomics. 2012:756284 doi: 10.1155/2012/756284.
Zhu, Y., Wang, W., Wang, X. (2015) Roles of transcriptional factor 7 in production of inflammatory factors for lung diseases. J Transl Med. 13:273 doi: 10.1186/s12967-015-0617-7
